# Supplementary material for: Strigolactones as an auxiliary hormonal defence mechanism against leafy gall syndrome in Arabidopsis thaliana
Source: PubMed Central journal article supplement (PMC4513927; doi:10.1093/jxb/erv309), 2015-06-30

**Supplementary Figure S1.** Histochemical analysis of *MAX2* expression during *R. fascians*-induced symptom development on *Arabidopsis* Col-0.

Representative plants either mock-inoculated with water or infected with *R. fascians* strains D188-5 and D188 at different time points. At least 20 plants were infected per time point by placing a 10- $\mu$ l drop of bacterial suspension at the heart of the rosette. All images were taken at the same magnification. Bar = 1 cm.

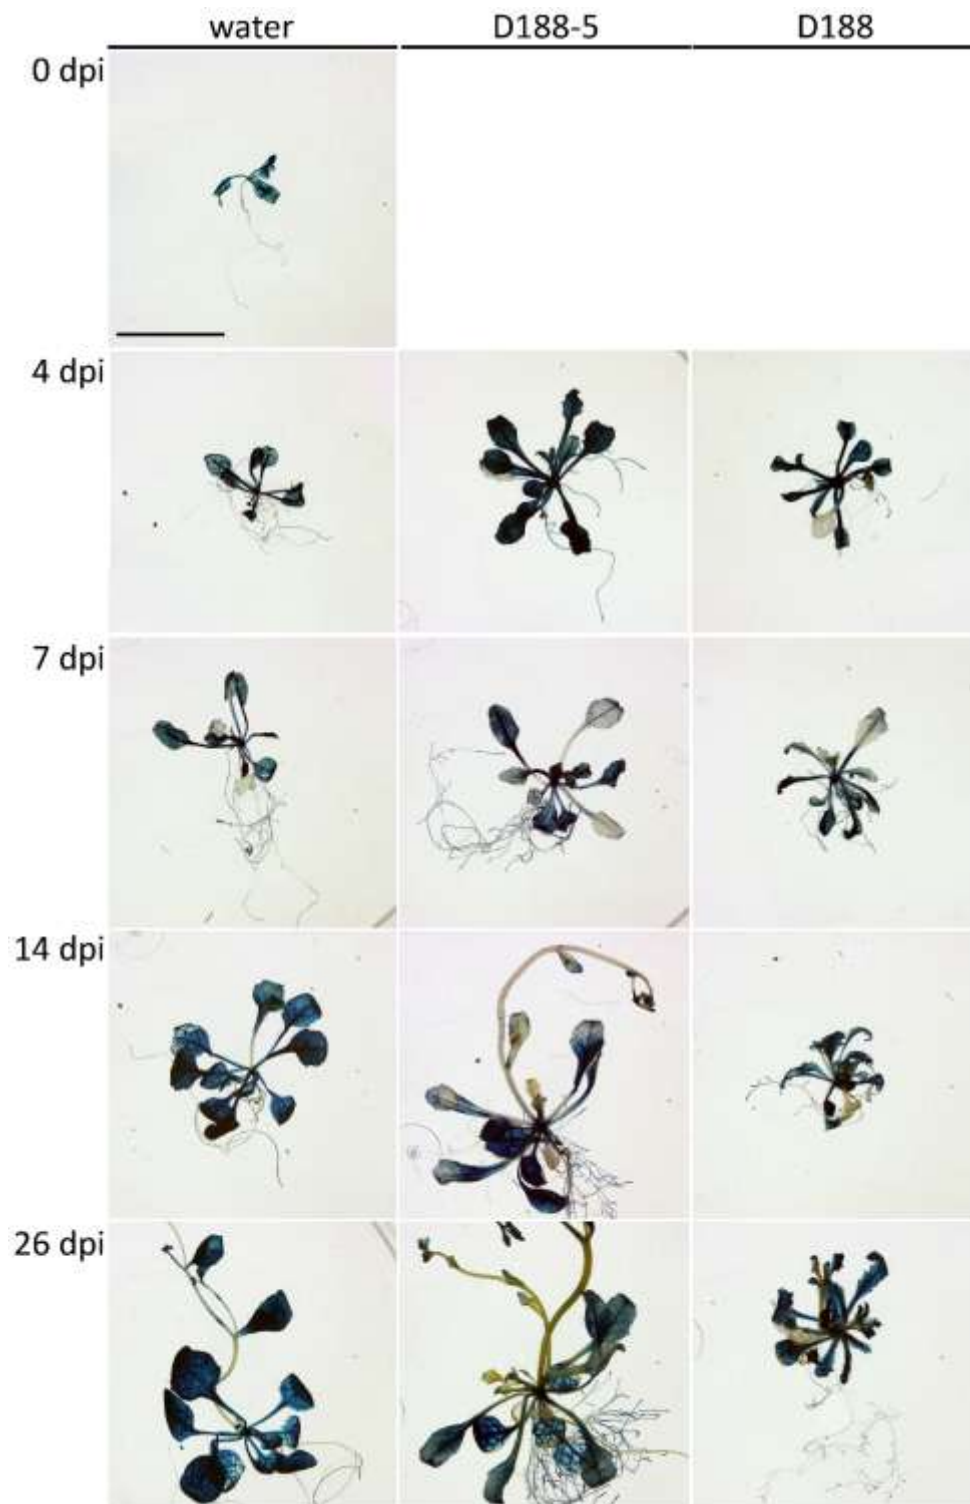

**Supplementary Figure S2.** Histochemical analysis of *MAX4* expression during *R. fascians*-induced symptom development on *Arabidopsis* Col-0.

Representative plants either mock-inoculated with water or infected with *R. fascians* strains D188-5 and D188 at different time points. At least 20 plants were infected per time point by placing a 10- $\mu$ l drop of bacterial suspension at the heart of the rosette. All images were taken at the same magnification. Bar = 1 cm.

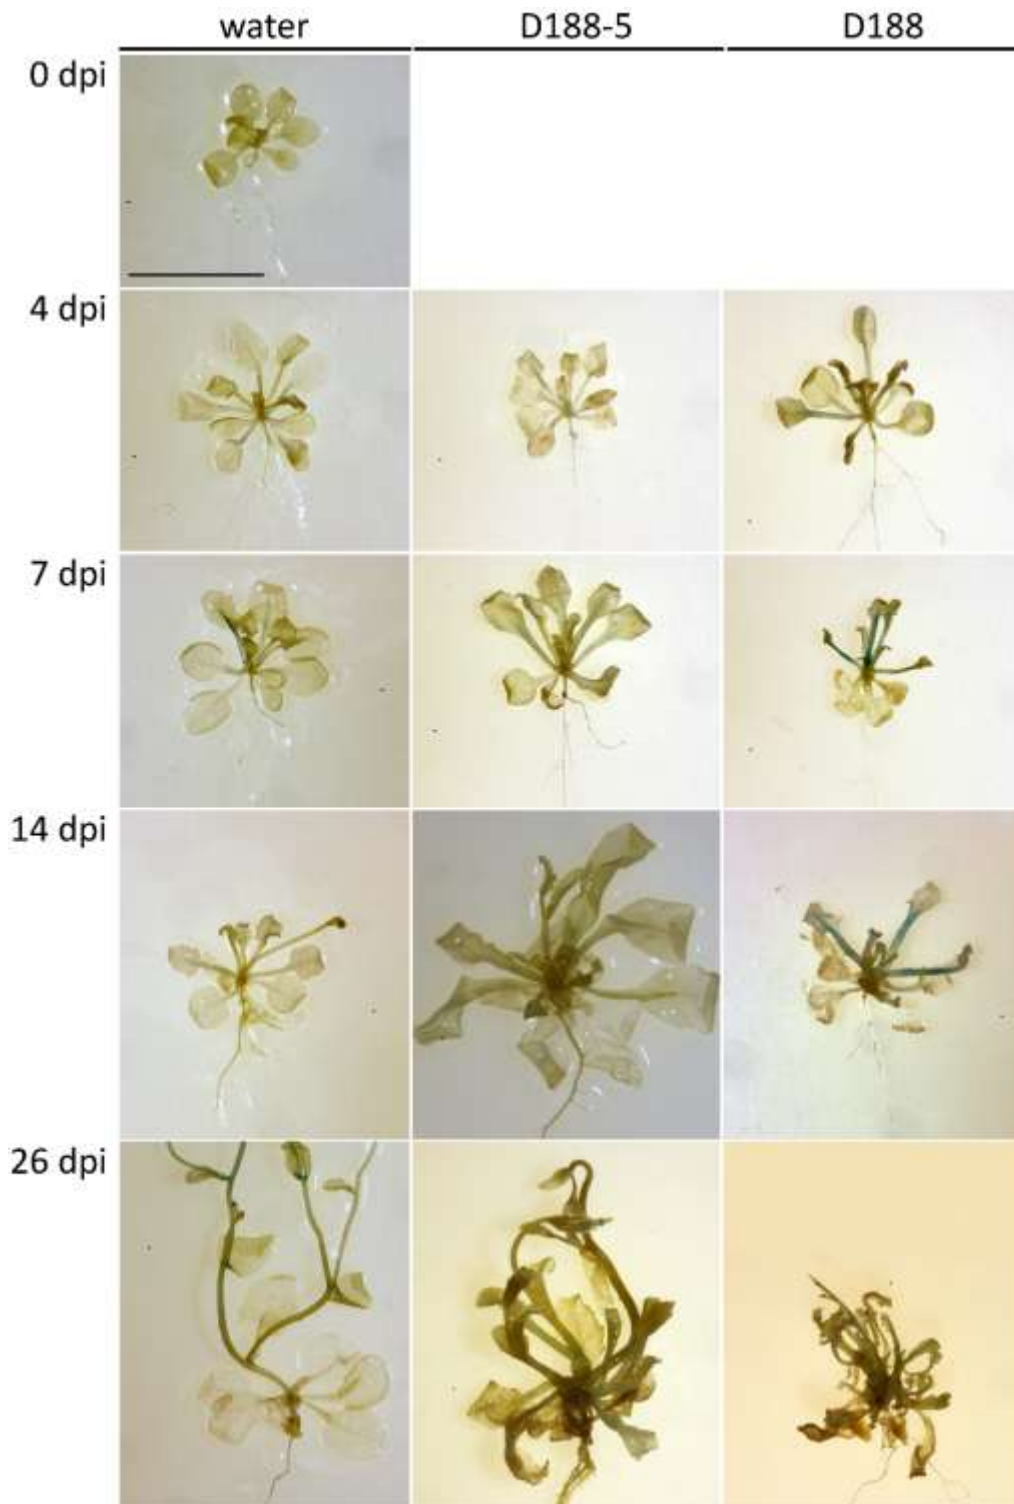

Supplement: supp_erv309_Supplementary_material.pdf [file supp_erv309_Supplementary_material.pdf]
